# Supplementary material for: High-Precision, Whole-Genome Sequencing of Laboratory Strains Facilitates Genetic Studies
Source: PLoS Genet. 2008 Aug 1;4(8):e1000139. doi: 10.1371/journal.pgen.1000139 (PMC2474695; doi:10.1371/journal.pgen.1000139)
Supplement: Table S3 — Bases that are different between the two isolates of B. subtilis strain JH642 (BGSC 1A867 and 1A96). (0.02 MB XLS) [file pgen.1000139.s004.xls]

## Sheet: Sheet1
Supplementary Table 3. Bases that are different between the two isolates of JH642
Position	Gene	Boundaries		JH642 BGSC 1A867		JH642 BGSC 1A96
		Left	Right	Base	Quality	Base	Quality
71323	spoIIE	70536	73019	A	87	G	93
410186	yckJ	409534	410238	C	93	T	89
620031	phoB	619643	621031	C	75	T	93
1610198	ylmF	1610168	1610617	T	63	C	78
2058573	yobF	2057926	2058849	G	87	A	78
3529005	Intergenic	3528885 (yveK)	3529131 (slr)	G	66	A	81
